# Supplementary material
Source: PubMed Central journal article supplement (PMC4817605)
Supplement: ismej201417x1.pdf [file ismej201417x1.pdf]

## SUPPLEMENTAL MATERIAL

### Supplementary Discussion.

#### *Soybean rhizosphere 1-year vs. 5-year*

The phylum *Actinobacteria* was more abundant in the 1-year soybean rhizosphere. This group is well known for antimicrobial secondary metabolites production, playing an important role in the decomposition of organic materials, as organic matter turnover and carbon cycle (Ventura *et al.*, 2007). Studies have shown a higher abundance of *Actinobacteria* in desert soils (Fierer *et al.*, 2012) and deforested areas (Navarrete *et al.*, unpublished), while *Verrucomicrobia* decreased. In our experiments, areas of native forest were deforested through slash-and-burn and then prepared to agriculture. As a consequence of deforestation, a high amount of carbon from the ashes is deposited in the soil. Also, there is an increase of soil temperature. This event could explain the higher abundance of *Actinobacteria* in the 1-year samples, since they are important decomposers; also, when the soil dries out, they are capable to produce spores, which allow them to resist to perturbations events (Ventura *et al.*, 2007). Interestingly, in the 5-year rhizosphere samples the phylum *Verrucomicrobia* increased, indicating a recovery after the deforestation.

The phylum *Proteobacteria* was significantly abundant in 5-year soybean rhizosphere. Specific groups of *Proteobacteria* contain plant-growth-promoting members, as *Gammaproteobacteria*, which was abundant in rhizosphere samples, and respond chemotactically to exudates and are efficient in the utilization of plants exudate products (García-Salamanca *et al.*, 2012). The class *Alphaproteobacteria* presented a significant enrichment in the 5-year soybean rhizosphere. Within this class, groups related to the nitrogen cycle were abundant in the rhizosphere. Genera related to nitrogen fixing found were *Rhizobium*, *Sinorhizobium*, *Bradyrhizobium*, *Azorhizobium*, and *Mesorhizobium*. Therefore, the long-term land use had a directed effect towards enrichment of specific bacterial groups.

In relation to functional traits, in the 5-year rhizosphere samples the “protein degradation, processing and modification” were abundant, which indicates intense bacterial activity in the rhizosphere. Also, within “regulation and cell signaling”, the “cAMP signaling in bacteria” was abundant in 5-year samples. The cAMP signaling system regulates important metabolic pathways through signaling cascade used in cell communication (Agarwal and Bishai, 2009), which is part of a complex system that drives basic cellular activities and coordinates cell actions. The high abundance of sequences related to cAMP signaling in 5-year rhizosphere may indicate a mechanism in which some species perceive and correctly respond to the microenvironment of the rhizosphere.

## References

- Agarwal N, Bishai WR. (2009). cAMP signaling in *Mycobacterium tuberculosis*. *Indian J Exp Biol* 47: 393-400.
- Fierer N, Leff JW, Adams BJ, Nielsen UN, Bates ST, Lauber CL, Owens S, Gilbert JA, Wall DH, Caporaso JG. (2012). Cross-biome metagenomic analyses of soil microbial communities and their functional attributes. *PNAS* 109: 21390-21395.
- García-Salamanca A, Molina-Henares MA, van Dillewijn P, Solano J, Pizarro-Tobías P, Roca A *et al.*, (2012). Bacterial diversity in the rhizosphere of maize and the surrounding carbonate-rich bulk soil. *Microb Biotech* 6: 36-44.
- Ventura M, Canchaya C, Tauch A, Chandra G, Fitzgerald GF, Chater KF *et al.*, (2007). Genomics of Actinobacteria: tracing the evolutionary history of an ancient phylum. *Microbiol Mol Biol Rev* 71: 495-548.

**Supplementary Table 1.** Soil chemical factors of sampling sites.

| <b>Soil Factors</b>          | <b>1-year crop</b> | <b>5-year crop</b> |
|------------------------------|--------------------|--------------------|
| pH                           | 4.1 ± 0.3          | 5.0 ± 0.2          |
| OM                           | 25.8 ± 3.8         | 35.2 ± 2.4         |
| Al                           | 9.8 ± 3.6          | 2.0 ± 0.7          |
| H+Al                         | 42.6 ± 13.7        | 50.4 ± 8.6         |
| m                            | 52.4 ± 14.5        | 8.0 ± 4.41         |
| P                            | 11.2 ± 18.8        | 33.6 ± 20.9        |
| K                            | 0.8 ± 0.3          | 1.7 ± 0.7          |
| Ca                           | 5.2 ± 1.8          | 13.6 ± 3.0         |
| Mg                           | 2.8 ± 3.6          | 9.0 ± 2.1          |
| SB                           | 8.8 ± 3.1          | 24.3 ± 5.4         |
| CEC                          | 51.4 ± 13.9        | 74.7 ± 12.0        |
| V                            | 18.2 ± 7.7         | 32.4 ± 4.6         |
| B                            | 0.2 ± 0.03         | 0.1 ± 0.04         |
| Cu                           | 0.3 ± 0            | 0.3 ± 0.06         |
| Fe                           | 93.2 ± 49.5        | 47.6 ± 6.2         |
| Mn                           | 1.6 ± 0.5          | 0.5 ± 0.2          |
| Zn                           | 0.9 ± 1.3          | 2.6 ± 2.1          |
| N                            | 1520.0±117.7       | 1434.6±99.7        |
| NH <sub>4</sub> <sup>+</sup> | 16.6 ± 1.69        | 15.0 ± 1.63        |
| NO <sub>3</sub> <sup>-</sup> | 13.3 ± 3.39        | 7.33 ± 0.94        |
| C                            | 15.0 ± 1.63        | 16.0 ± 0.81        |
| Sand                         | 50.3±1.88          | 39.6±1.24          |
| Silt                         | 1.66±0.94          | 1.33±0.47          |
| Clay                         | 48.0±0.0           | 59.0±1.41          |

The values are averages based on quintuplicate sampling points in each site. Standard deviations are shown in the table.

Ca, Mg, K, Al, potential acidity (H+Al), sum of bases (SB) are expressed in nmol.kg<sup>-1</sup>; OM and C is expressed in g.Kg<sup>-1</sup>; P is expressed in mg.kg<sup>-1</sup>; B, Fe, Mn, Zn, K, Cu, and cation exchange capacity in pH 7 (CEC) are expressed in mg.dm<sup>-3</sup>; Sand, silt and clay are expressed in %; N (total), NH<sub>4</sub><sup>+</sup> and NO<sub>3</sub><sup>-</sup> are expressed in mg.kg<sup>-1</sup>. P and K – Mehlich 1 extractor. Ca, Mg, and Al – Kcl 1N. H+Al – SMP extractor. N – Kjeldahl. NH<sub>4</sub><sup>+</sup> and NO<sub>3</sub><sup>-</sup> – Raney/Kjeldahl. OM – organic matter. m – Al saturation index. V – base saturation index.

**Supplementary Table 2.** Number of sequencing reads, base pairs, reads assigned to SEED Subsystems and percentages of predict proteins after quality control on MG-RAST pipeline.

| Sample ID | MG-RAST ID | Sample    | N. of sequencing reads | Mean sequence length | Total bp*  | N. of predict Subsystems functions* | % of predicted proteins* |
|-----------|------------|-----------|------------------------|----------------------|------------|-------------------------------------|--------------------------|
| 1LM       | 4477751.3  | Riz_5a_1  | 141,552                | 523±46               | 61,451,072 | 98,237                              | 74.7                     |
| 2LM       | 4477749.3  | Riz_5a_2  | 151,054                | 522±42               | 63,711,128 | 102,880                             | 75.4                     |
| 3LM       | 4477755.3  | Riz_5a_3  | 140,546                | 520±45               | 58,624,166 | 94,250                              | 75.1                     |
| 4LM       | 4477757.3  | Bulk_5a_1 | 144,908                | 520±46               | 62,571,569 | 94,952                              | 71.0                     |
| 5LM       | 4477789.3  | Bulk_5a_2 | 137,109                | 523±42               | 58,459,177 | 87,173                              | 69.9                     |
| 6LM       | 4477790.3  | Bulk_5a_3 | 144,587                | 521±41               | 57,485,200 | 87,555                              | 71.4                     |
| 7LM       | 4478030.3  | Riz_1a_1  | 145,214                | 518±68               | 58,031,403 | 94,180                              | 76.4                     |
| 8LM       | 4478037.3  | Riz_1a_2  | 124,076                | 527±56               | 51,095,519 | 80,186                              | 73.8                     |
| 9LM       | 4478934.3  | Riz_1a_3  | 113,953                | 520±36               | 9,678,615  | 9,788                               | 75.9                     |
| 10LM      | 4478038.3  | Bulk_1a_1 | 140,141                | 526±46               | 58,816,390 | 96,369                              | 76.8                     |
| 11LM      | 4478222.3  | Bulk_1a_2 | 142,020                | 526±49               | 50,166,332 | 77,447                              | 72.7                     |
| 12LM      | 4478283.3  | Bulk_1a_3 | 140,261                | 527±56               | 60,814,070 | 98,142                              | 75.8                     |
| 13LM      | 4478290.3  | Riz_5b_1  | 147,028                | 525±45               | 65,025,641 | 108,156                             | 77.4                     |
| 14LM      | 4478292.3  | Riz_5b_2  | 129,829                | 526±45               | 55,750,716 | 88,769                              | 74.5                     |
| 15LM      | 4478291.3  | Riz_5b_3  | 112,056                | 527±50               | 36,967,527 | 56,999                              | 72.9                     |
| 16LM      | 4478294.3  | Bulk_5b_1 | 138,556                | 525±47               | 55,060,604 | 83,310                              | 71.2                     |
| 17LM      | 4478936.3  | Bulk_5b_2 | 137,939                | 523±41               | 58,658,766 | 92,450                              | 73.6                     |
| 18LM      | 4478937.3  | Bulk_5b_3 | 146,385                | 524±43               | 55,611,272 | 85,403                              | 71.9                     |
| 19LM      | 4478938.3  | Riz_1b_1  | 126,119                | 523±47               | 35,784,579 | 59,398                              | 77.9                     |
| 20LM      | 4478939.3  | Riz_1b_2  | 133,146                | 525±47               | 51,791,233 | 89,065                              | 80.1                     |
| 21LM      | 4479311.3  | Riz_1b_3  | 151,804                | 524±40               | 68,089,631 | 116,414                             | 79.5                     |
| 22LM      | 4478940.3  | Bulk_1b_1 | 138,073                | 523±42               | 55,607,597 | 92,786                              | 77.8                     |
| 23LM      | 4478941.3  | Bulk_1b_2 | 143,858                | 525±45               | 55,511,047 | 89,673                              | 75.6                     |
| 24LM      | 4478943.3  | Bulk_1b_3 | 123,137                | 526±50               | 51,204,159 | 83,520                              | 76.5                     |

\* Post Quality Control

**Supplementary Table 3.** Relative proportion of matches to a given subsystem hierarchy level 1.

| <b>Subsystem hierarchy level 1</b>                 | <b>Rhizosphere</b> | <b>Subsystem hierarchy level 1</b>                 | <b>Bulk Soil</b> |
|----------------------------------------------------|--------------------|----------------------------------------------------|------------------|
| Carbohydrates                                      | 0.133              | Clustering-based subsystems                        | 0.143            |
| Clustering-based subsystems                        | 0.112              | Carbohydrates                                      | 0.141            |
| Cofactors, Vitamins, Prosthetic Groups, Pigments   | 0.101              | Amino Acids and Derivatives                        | 0.110            |
| Miscellaneous                                      | 0.091              | Miscellaneous                                      | 0.078            |
| Membrane Transport                                 | 0.069              | Cofactors, Vitamins, Prosthetic Groups, Pigments   | 0.066            |
| Amino Acids and Derivatives                        | 0.058              | Protein Metabolism                                 | 0.065            |
| Iron acquisition and metabolism                    | 0.045              | RNA Metabolism                                     | 0.049            |
| Cell Wall and Capsule                              | 0.044              | Fatty Acids, Lipids, and Isoprenoids               | 0.046            |
| RNA Metabolism                                     | 0.042              | Cell Wall and Capsule                              | 0.042            |
| Protein Metabolism                                 | 0.030              | DNA Metabolism                                     | 0.033            |
| Respiration                                        | 0.030              | Respiration                                        | 0.025            |
| Metabolism of Aromatic Compounds                   | 0.028              | Virulence, Disease and Defense                     | 0.024            |
| Stress Response                                    | 0.027              | Membrane Transport                                 | 0.024            |
| Fatty Acids, Lipids, and Isoprenoids               | 0.027              | Nucleosides and Nucleotides                        | 0.023            |
| Virulence, Disease and Defense                     | 0.026              | Stress Response                                    | 0.023            |
| Nucleosides and Nucleotides                        | 0.023              | Metabolism of Aromatic Compounds                   | 0.021            |
| Regulation and Cell signaling                      | 0.020              | Regulation and Cell signaling                      | 0.013            |
| Phosphorus Metabolism                              | 0.018              | Sulfur Metabolism                                  | 0.012            |
| DNA Metabolism                                     | 0.017              | Cell Division and Cell Cycle                       | 0.011            |
| Phages, Prophages, Transposable elements, Plasmids | 0.015              | Motility and Chemotaxis                            | 0.010            |
| Motility and Chemotaxis                            | 0.012              | Phosphorus Metabolism                              | 0.010            |
| Nitrogen Metabolism                                | 0.010              | Phages, Prophages, Transposable elements, Plasmids | 0.010            |
| Sulfur Metabolism                                  | 0.006              | Nitrogen Metabolism                                | 0.007            |
| Cell Division and Cell Cycle                       | 0.005              | Iron acquisition and metabolism                    | 0.004            |
| Potassium metabolism                               | 0.005              | Potassium metabolism                               | 0.003            |
| Dormancy and Sporulation                           | 0.004              | Secondary Metabolism                               | 0.003            |
| Secondary Metabolism                               | 0.003              | Dormancy and Sporulation                           | 0.001            |
| Photosynthesis                                     | 0.000              | Photosynthesis                                     | 0.001            |

Hits were generated by blasting sequences of 24 metagenomes (12 rhizosphere and 12 bulk soil) to the MG-RAST subsystem database with a minimum alignment length of 50 bp and an E value cut-off of  $1 \times 10^{-5}$ . Relative representation in the metagenomes was calculated by dividing the number of hit to each category by the total number of hits to all categories.

**Supplementary Table 4.** AIC values for 6 rank abundance distribution models. Lowest AIC value for each sample represents the best fit model.

| Sample      | Environment | Year    | Exp. | AIC <sup>1</sup> |             |                 |           |                 |                 |
|-------------|-------------|---------|------|------------------|-------------|-----------------|-----------|-----------------|-----------------|
|             |             |         |      | Broken-stick     | Pre-Emption | Log-Normal      | Zipf      | Zipf-Mandelbrot | ZSM             |
| <b>10LM</b> | bulk soil   | 1-year  | A    | 16566.6          | 14433.6     | 3544.1          | 10722.1   | <i>nd</i>       | <b>3011.52*</b> |
| <b>11LM</b> | bulk soil   | 1-year  | A    | 15453.4          | 13136.4     | 3608.7          | 9253.8    | <i>nd</i>       | <b>3165.38*</b> |
| <b>12LM</b> | bulk soil   | 1-year  | A    | 18072.4          | 17130.7     | 3353.5          | 9213.3    | 4932.9          | <b>3187.30*</b> |
| <b>22LM</b> | bulk soil   | 1-year  | B    | 12397.6          | 11266.7     | 3030.8          | 10558.3   | <i>nd</i>       | <b>2901.26*</b> |
| <b>23LM</b> | bulk soil   | 1-year  | B    | 12033.53         | 11631.04    | 2848.88         | 9408.63   | 4589.85         | <b>2830.94*</b> |
| <b>24LM</b> | bulk soil   | 1-year  | B    | 9897.69          | 9333.39     | <b>2878.37*</b> | 9506.42   | 4312.78         | 2905.78         |
| <b>4LM</b>  | bulk soil   | 5-years | A    | 23629.23         | 20288.77    | <b>2845.67*</b> | 8706.34   | 4902.39         | 2931.52         |
| <b>5LM</b>  | bulk soil   | 5-years | A    | 20612.1          | 18608.4     | 3168.4          | 8213.9    | 4571.0          | <b>2904.84*</b> |
| <b>6LM</b>  | bulk soil   | 5-years | A    | 20844.6          | 19224.9     | 3034.6          | 7691.1    | 4558.6          | <b>2860.14*</b> |
| <b>16LM</b> | bulk soil   | 5-years | B    | 12388.80         | 12005.43    | <b>2482.06*</b> | 8162.28   | 4123.71         | 2960.74         |
| <b>17LM</b> | bulk soil   | 5-years | B    | 15095.98         | 14049.54    | <b>2599.84*</b> | 9048.28   | 4728.68         | 2914.10         |
| <b>18LM</b> | bulk soil   | 5-years | B    | 13229.33         | 12020.41    | <b>2763.61*</b> | 9433.87   | 4816.68         | 2952.98         |
| <b>7LM</b>  | rhizosphere | 1-year  | A    | 17797.50         | 14802.7     | 3453.7          | 10613.0   | <i>nd</i>       | <b>2984.68*</b> |
| <b>8LM</b>  | rhizosphere | 1-year  | A    | 17306.3          | 13818.2     | 3920.6          | 10024.1   | <i>nd</i>       | <b>2994.92*</b> |
| <b>9LM</b>  | rhizosphere | 1-year  | A    | <i>nd</i>        | <i>nd</i>   | <i>nd</i>       | <i>nd</i> | <i>nd</i>       | <i>nd</i>       |
| <b>19LM</b> | rhizosphere | 1-year  | B    | 7931.75          | 7375.81     | <b>2433.63*</b> | 7143.04   | 2418.04         | 2882.70         |
| <b>20LM</b> | rhizosphere | 1-year  | B    | 12679.91         | 11604.07    | <b>2742.40*</b> | 9591.34   | 4776.32         | 2961.08         |
| <b>21LM</b> | rhizosphere | 1-year  | B    | 16487.3          | 14630.0     | 3438.7          | 12509.2   | <i>nd</i>       | <b>2971.08*</b> |
| <b>1LM</b>  | rhizosphere | 5-years | A    | 17254.95         | 15507.25    | <b>2955.34*</b> | 10061.52  | <i>nd</i>       | 2966.68         |
| <b>2LM</b>  | rhizosphere | 5-years | A    | 20012.0          | 17093.2     | 3487.8          | 3495.4    | <i>nd</i>       | <b>3042.70*</b> |
| <b>3LM</b>  | rhizosphere | 5-years | A    | 17708.09         | 15857.41    | <b>2721.70*</b> | 9287.75   | 4968.54         | 3014.40         |
| <b>13LM</b> | rhizosphere | 5-years | B    | 16146.35         | 14662.35    | <b>2865.83*</b> | 11147.48  | <i>nd</i>       | 2938.24         |
| <b>14LM</b> | rhizosphere | 5-years | B    | 15409.74         | 13701.41    | <b>2753.47*</b> | 9417.29   | 5076.29         | 2848.16         |
| <b>15LM</b> | rhizosphere | 5-years | B    | 9383.1           | 8949.1      | <b>2271.80*</b> | 6210.9    | 3528.3          | 2762.82         |

<sup>1</sup>AIC for radfit-generated models calculated the equation  $AIC = -2\log\text{-likelihood} + 2*\text{npar}$ . AIC was calculated in the same way for the zero-sum model, from the minimum of log-likelihood reported by TeTame, then multiplied by -1 to obtain the maximum log-likelihood value. \* The best fit model with lowest AIC value. *nd* not determined

## Supplementary Figure 1.

**A**

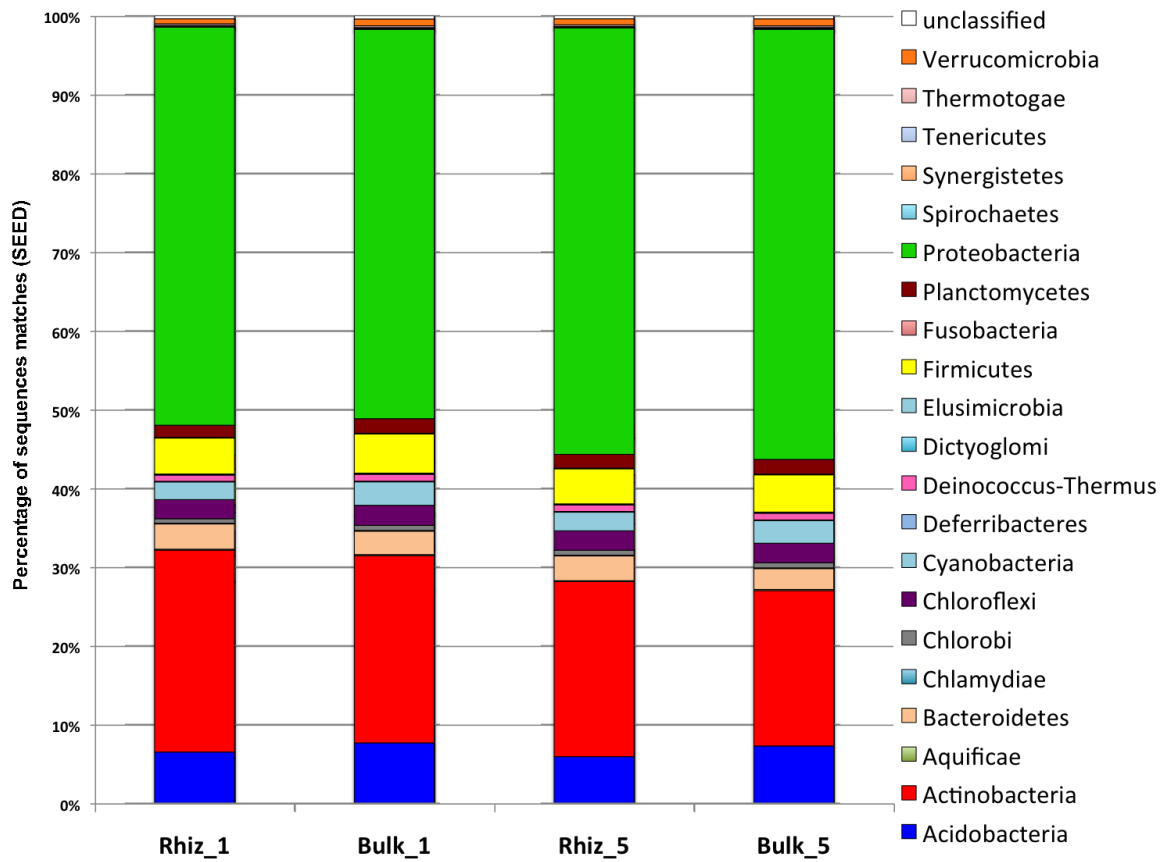

**B**

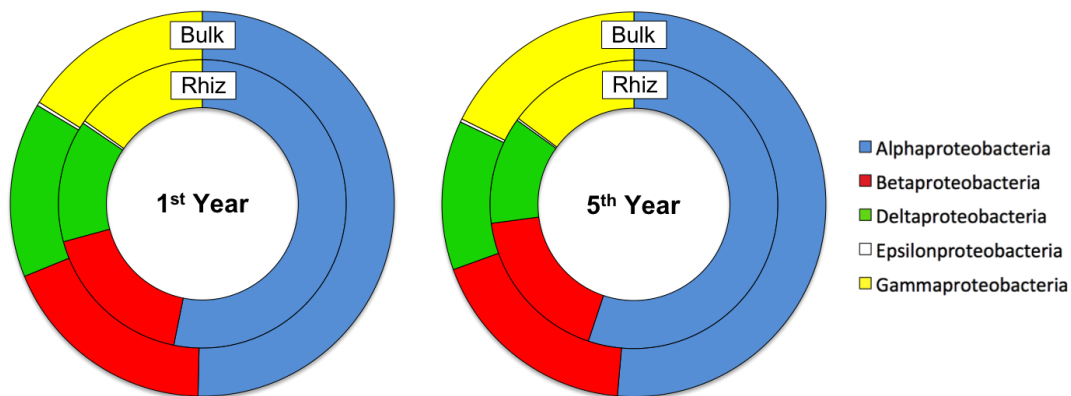

**SF1.** Taxonomic affiliation of metagenomic reads. (A) Results for complete datasets evaluated by BLASTX analysis against the SEED database using MG-RAST v 3.3 software. (B) Differential proportion of sequences assigned within the phylum *Proteobacteria* for rhizosphere and bulk soil of first and fifth years of crop.

## Supplementary Figure 2.

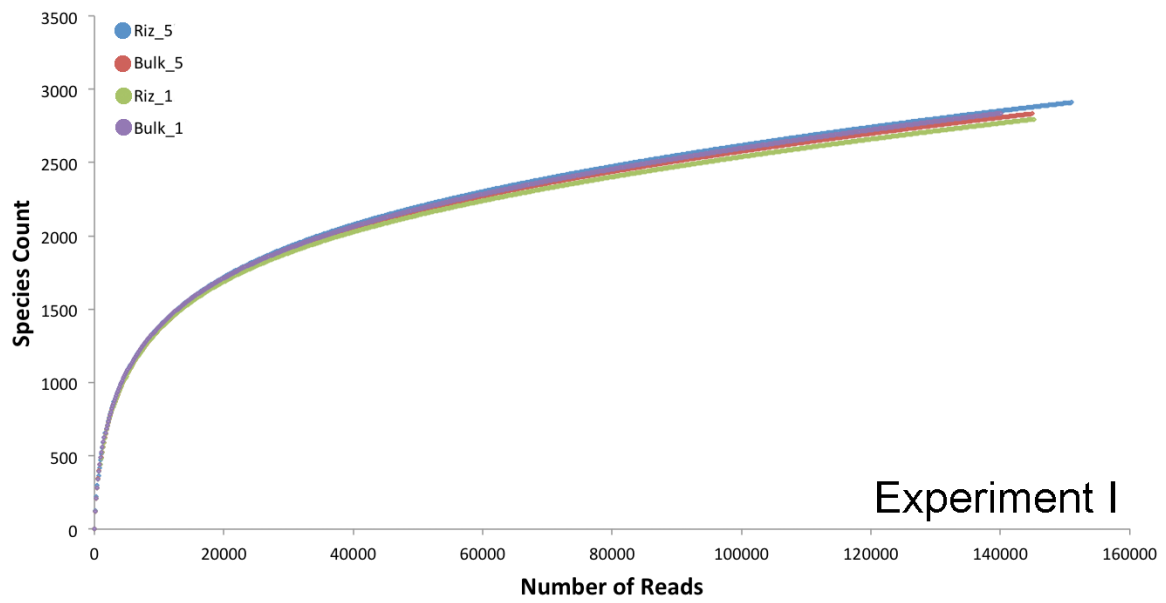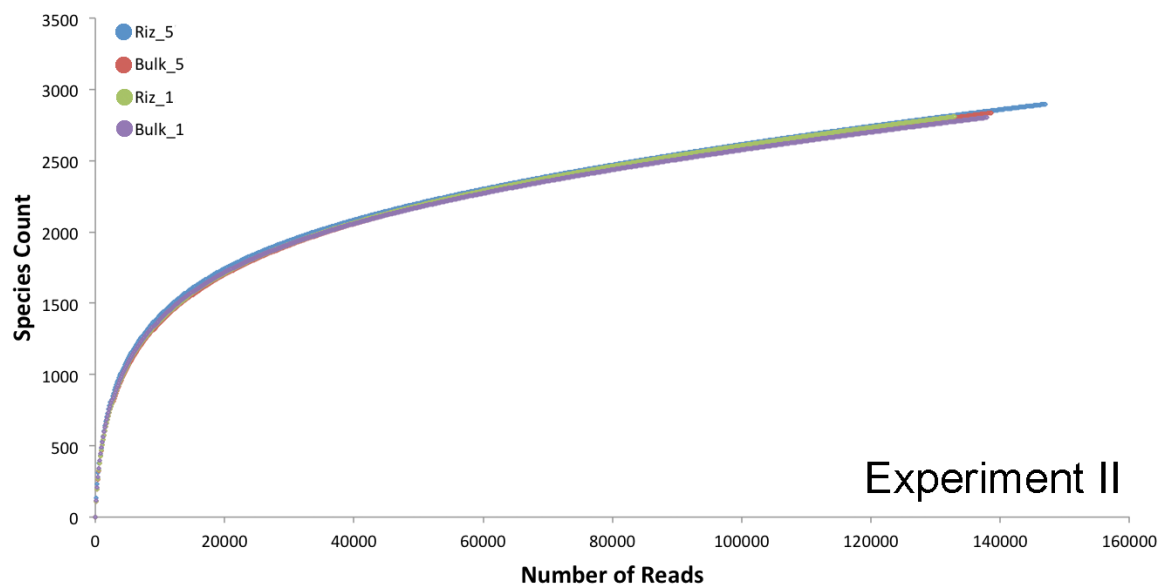

**SF2.** Rarefaction curves of annotated species richness generated for samples from bulk soil and rhizosphere of first and fifth of soybean cultivation. The curves represent the average number of different species annotations for subsamples of the complete dataset.



### Supplementary Figure 3.

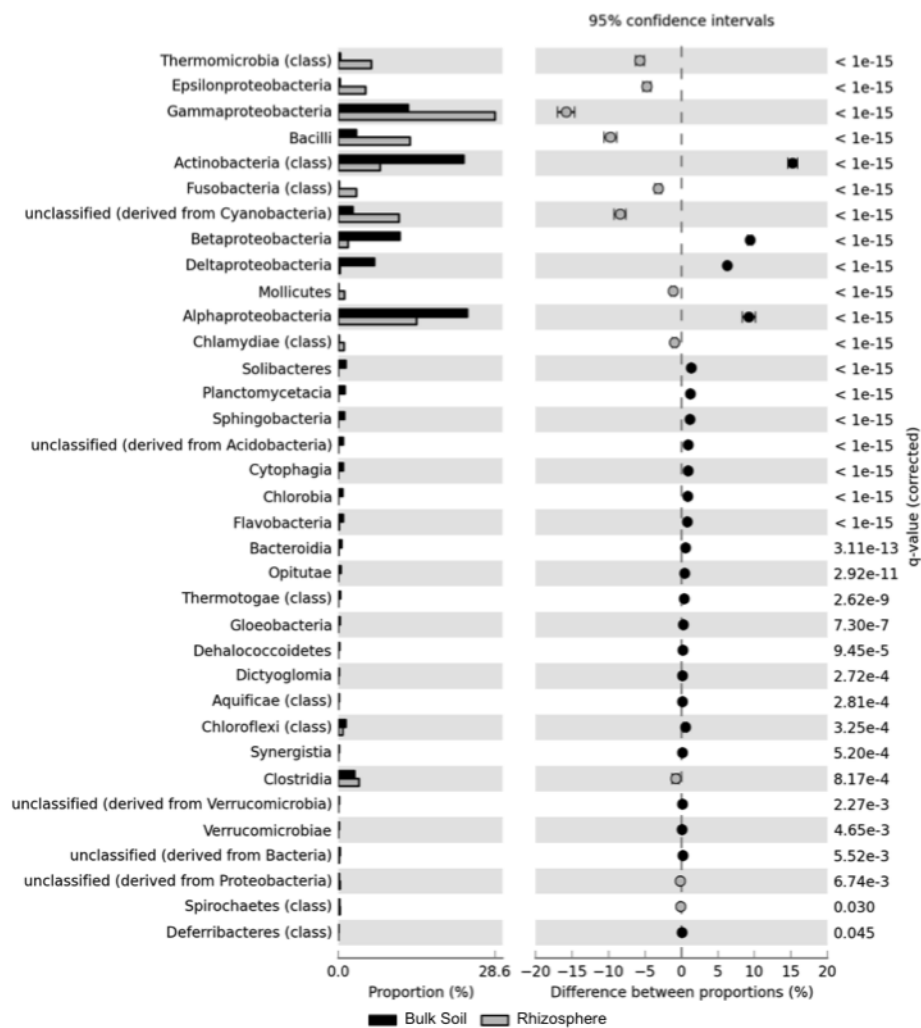

**SF3.** STAMP analysis of taxonomic profiles at class level between rhizosphere and bulk soil samples. Groups overrepresented in the bulk soil (black) correspond to positive differences between proportions and groups overrepresented rhizosphere (gray) correspond to negative differences between proportions. Corrected *P*-values (q-values) were calculated using Benjamini-Hochberg FDR approach ( $p < 0.05$ ).

# Supplementary Figure 4.

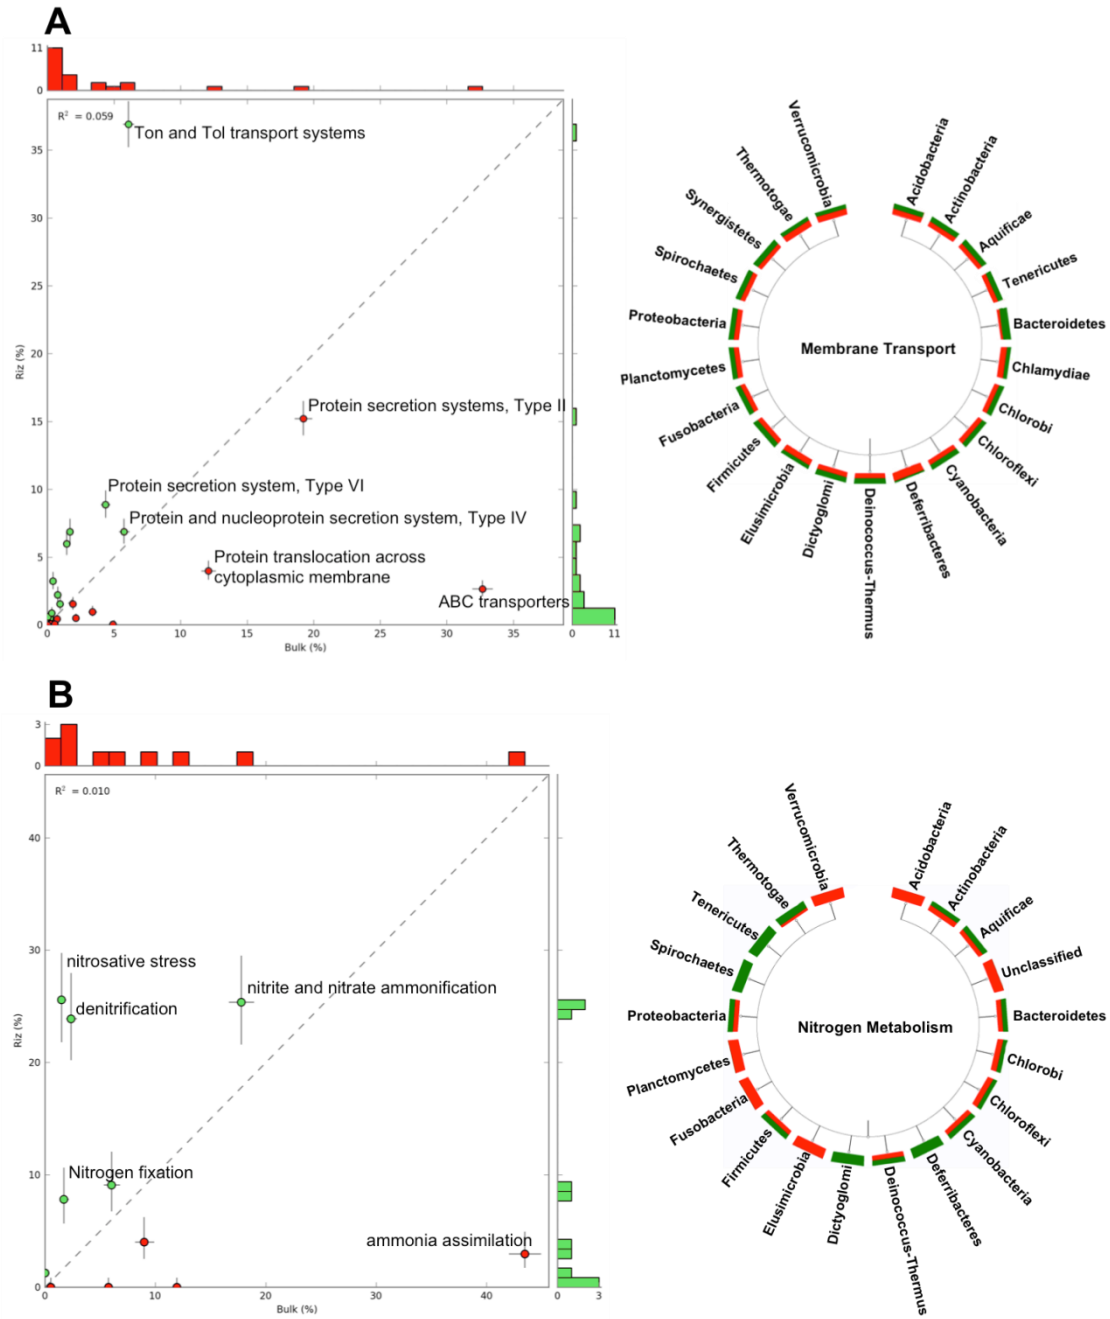

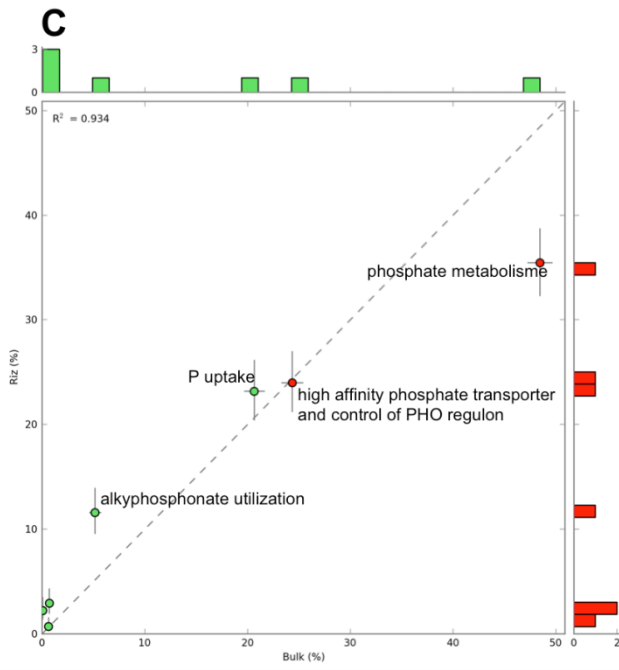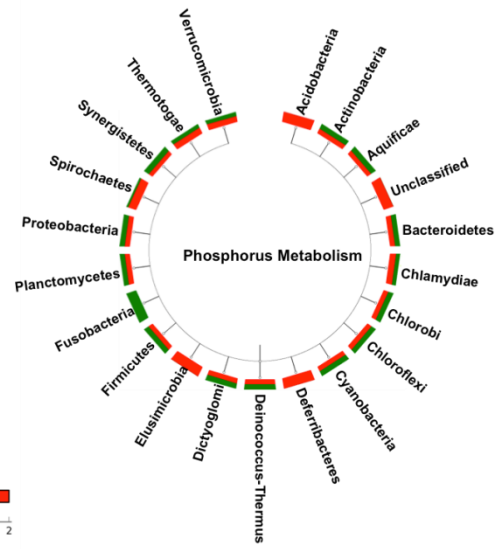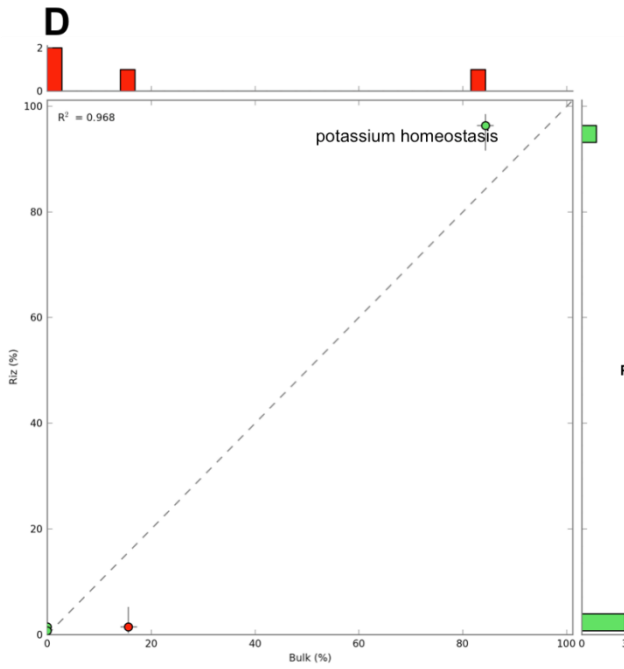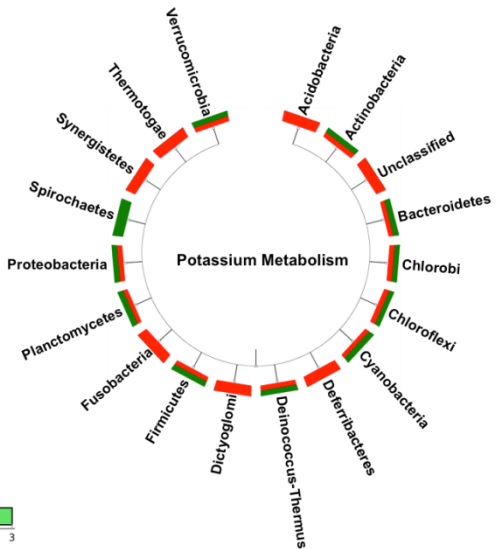

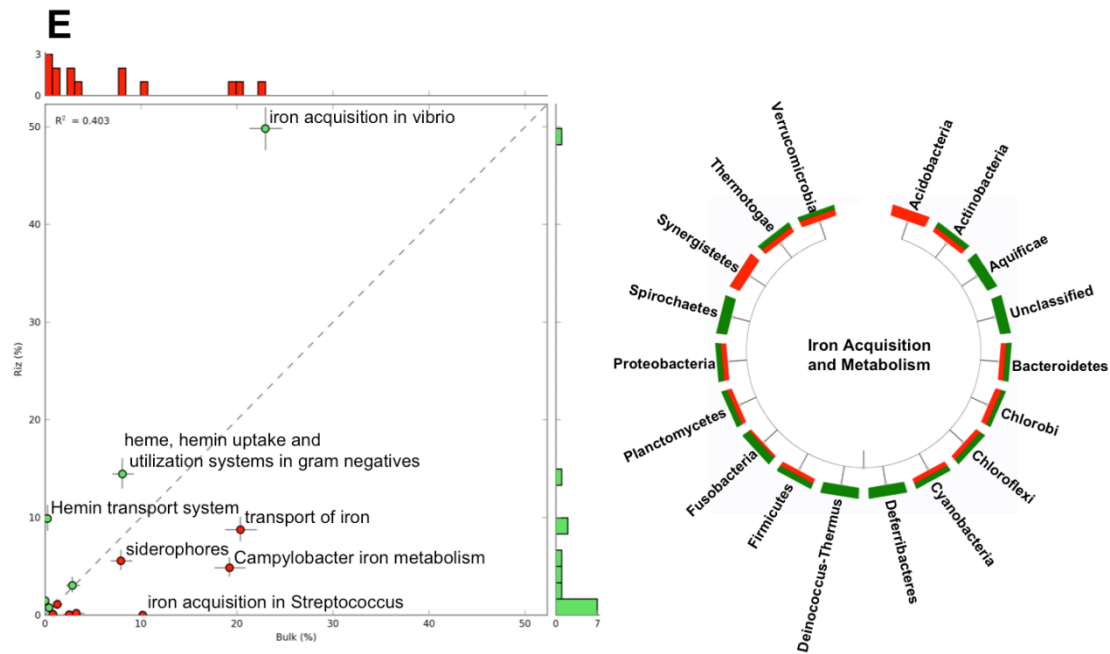

**SF4.** Functional and taxonomic profiles of bulk soil samples (red) and rhizosphere (green) of (A) membrane transport, (B) nitrogen metabolism, (C) phosphorus metabolism, (D) potassium metabolism and (E) iron acquisition and metabolism. The data was calculated for metagenomes from bulk soil and rhizosphere and compared to SEED database using a maximum  $E$ -value of  $1e^{-5}$  and a minimum alignment length of 50 bp.

## Supplementary Figure 5.

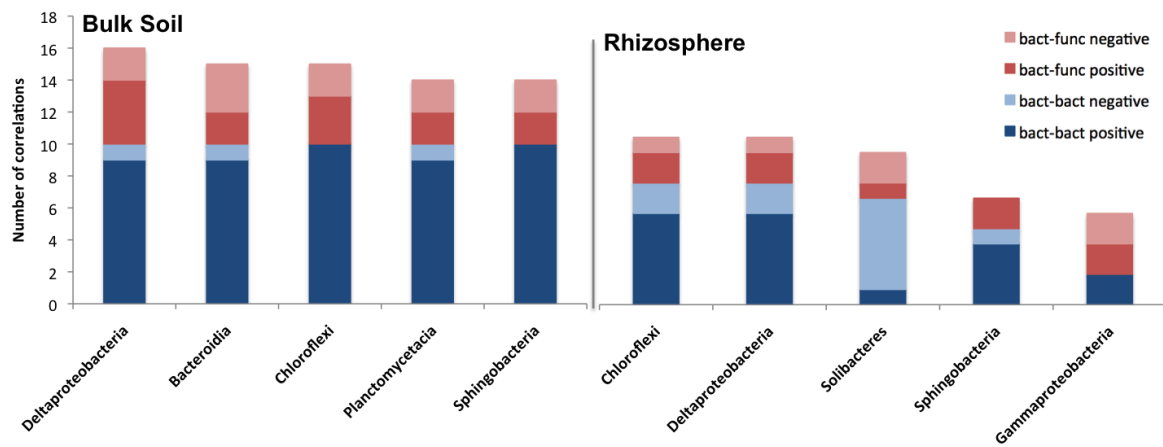

**SF5.** Top five bacterial groups with higher positive and negative correlations in bulk soil and rhizosphere samples. Numbers of correlations (positives and negatives) between bacteria and bacteria (bact-bact), bacteria and function (bact-func), and function and function (func-func) in bulk soil and in rhizosphere samples.

## Supplementary Figure 6.

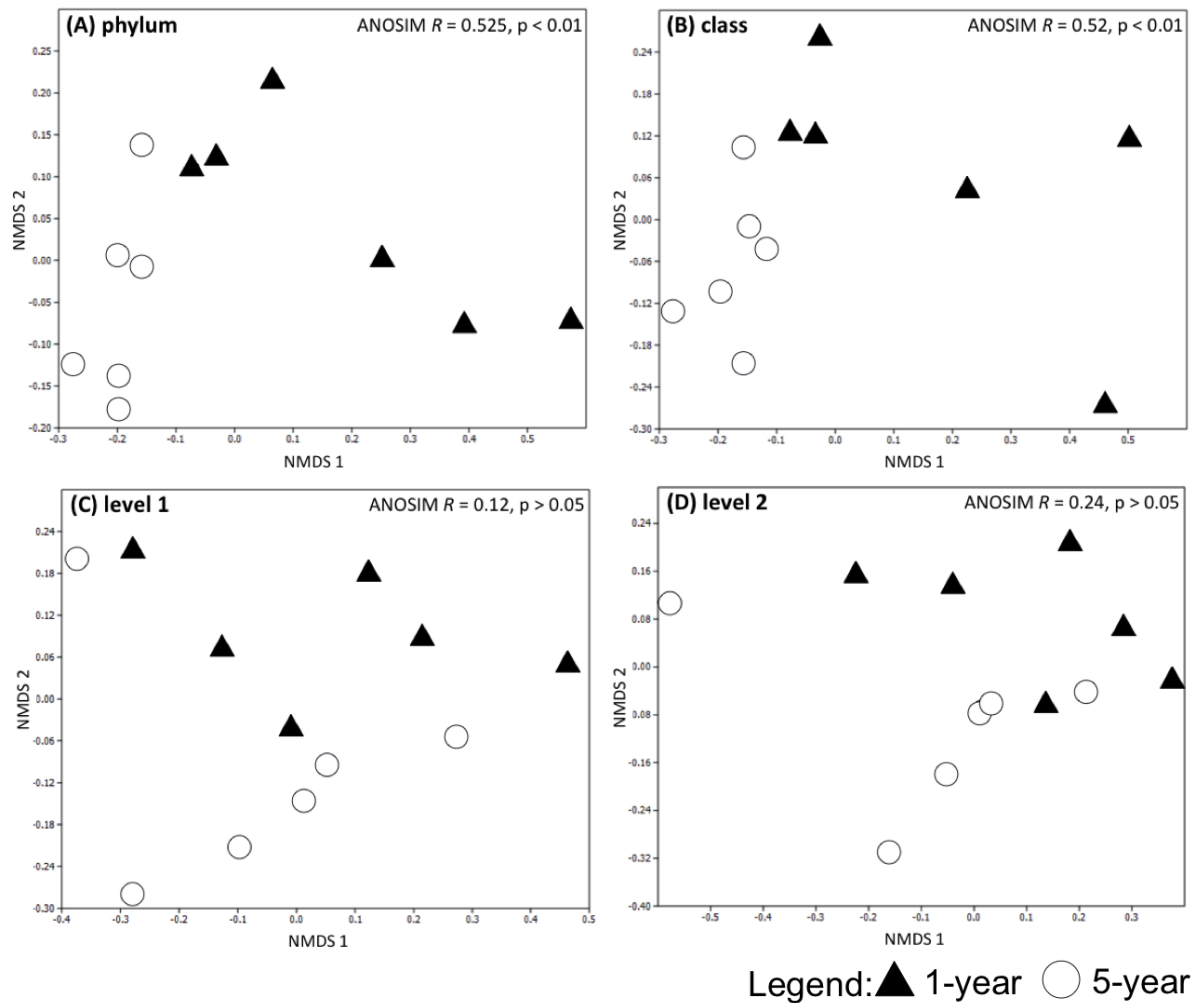

**SF6.** NMDS of Bray-Curtis similarity matrix performed on taxonomic and functional profiles between 1-year and 5-year soybean rhizosphere samples. (A) Taxonomic plot at phylum level. (B) Taxonomic plot at class level. (C) Functional Plot at level 1. (D) Functional plot at level 2. Similarity values (ANOSIM) are shown in the upper right of each plot.
